# Supplementary figures and images for: Disclosing the leaching behaviour of Pd@CMK3 catalysts in formic acid decomposition by electron tomography
Source: Royal Society of Chemistry journal article supplement (doi:10.1039/d2na00664b), 2023-01-01

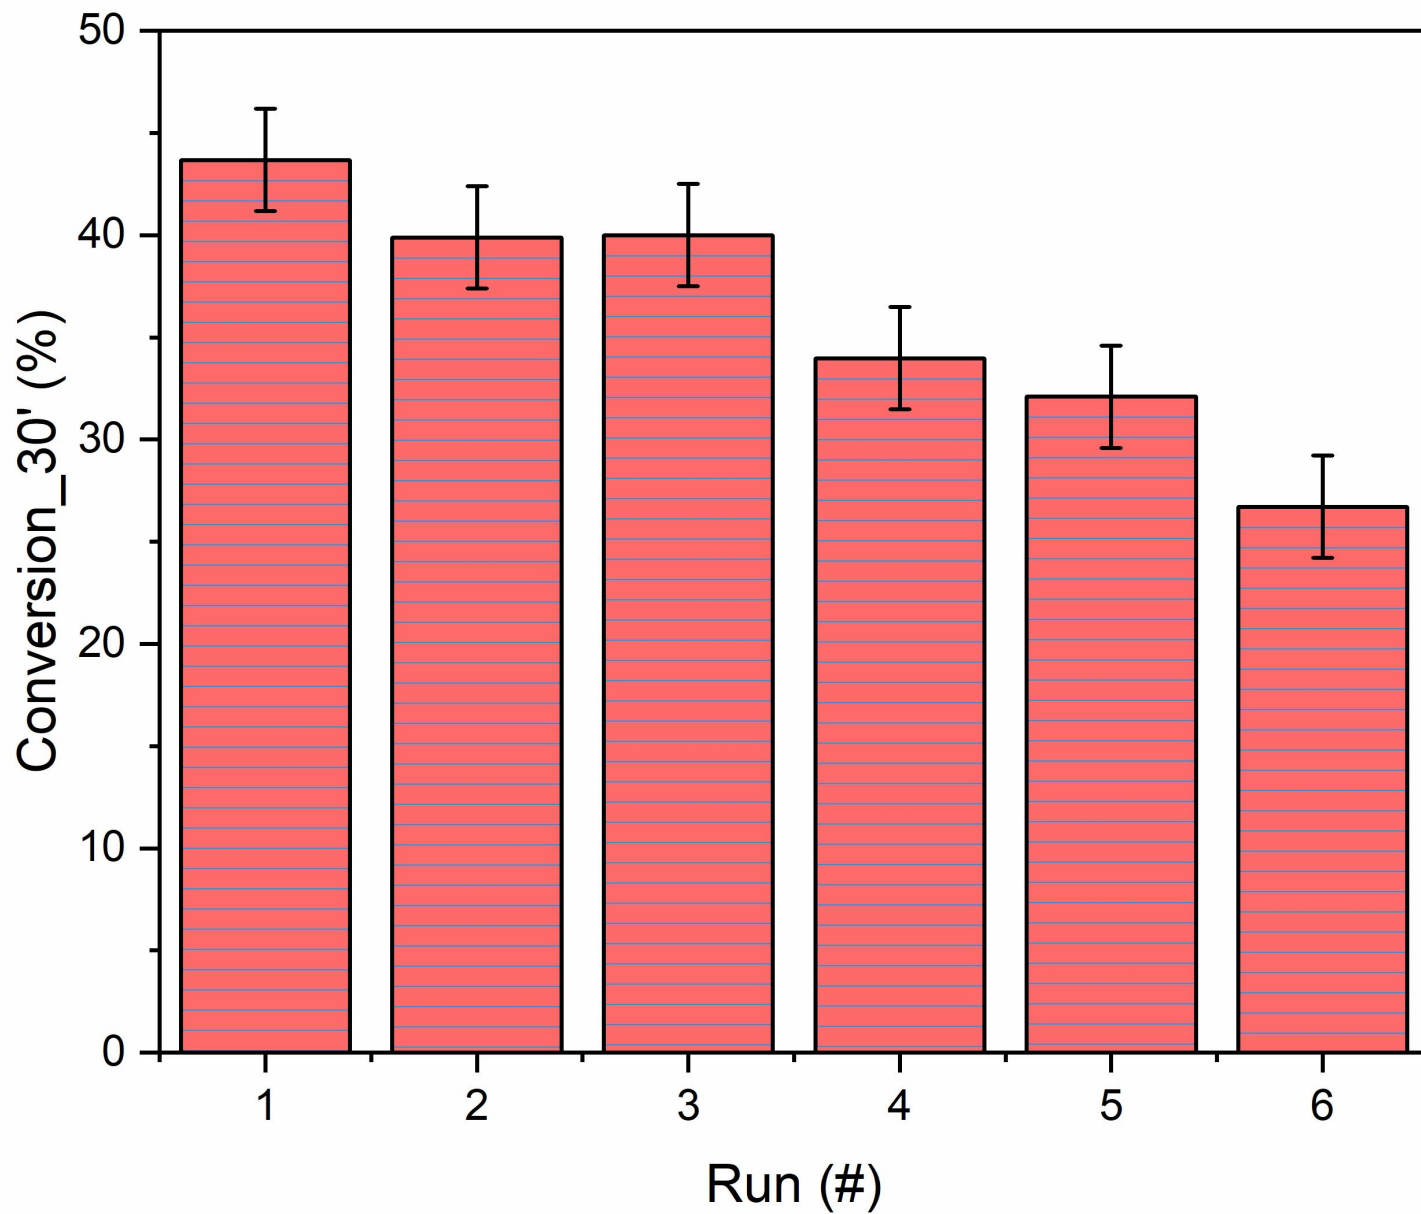

Supplement: d2na00664b1.pdf [file d2na00664b1.pdf]

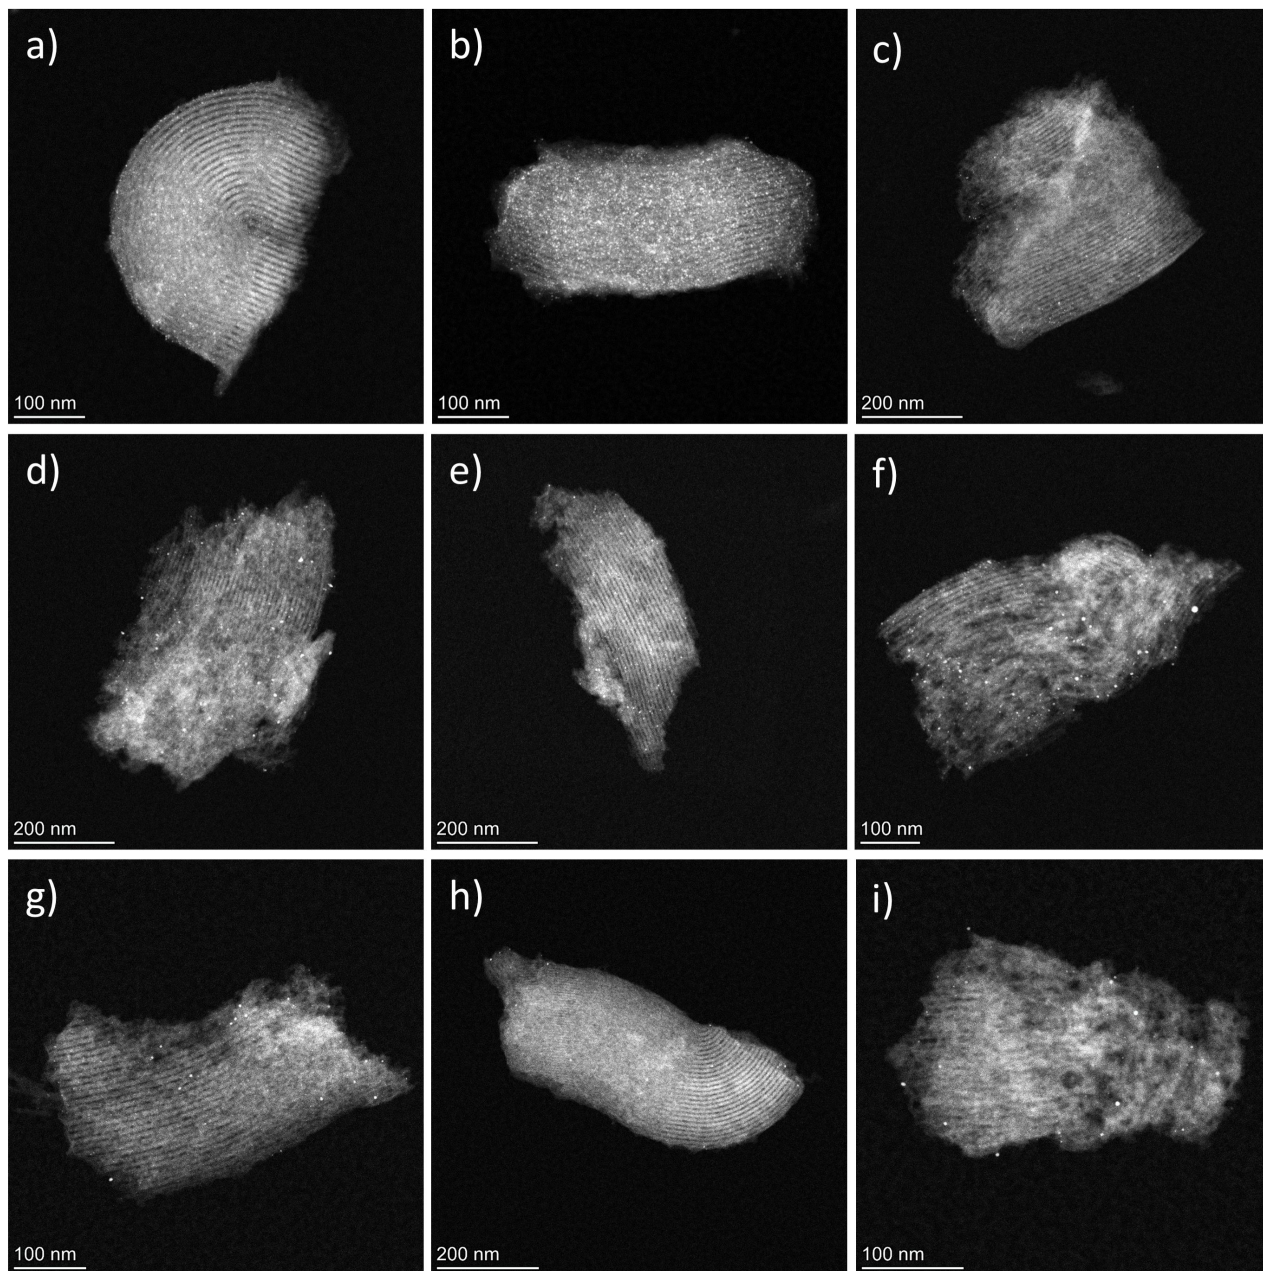

Supplement: d2na00664b2.pdf [file d2na00664b2.pdf]

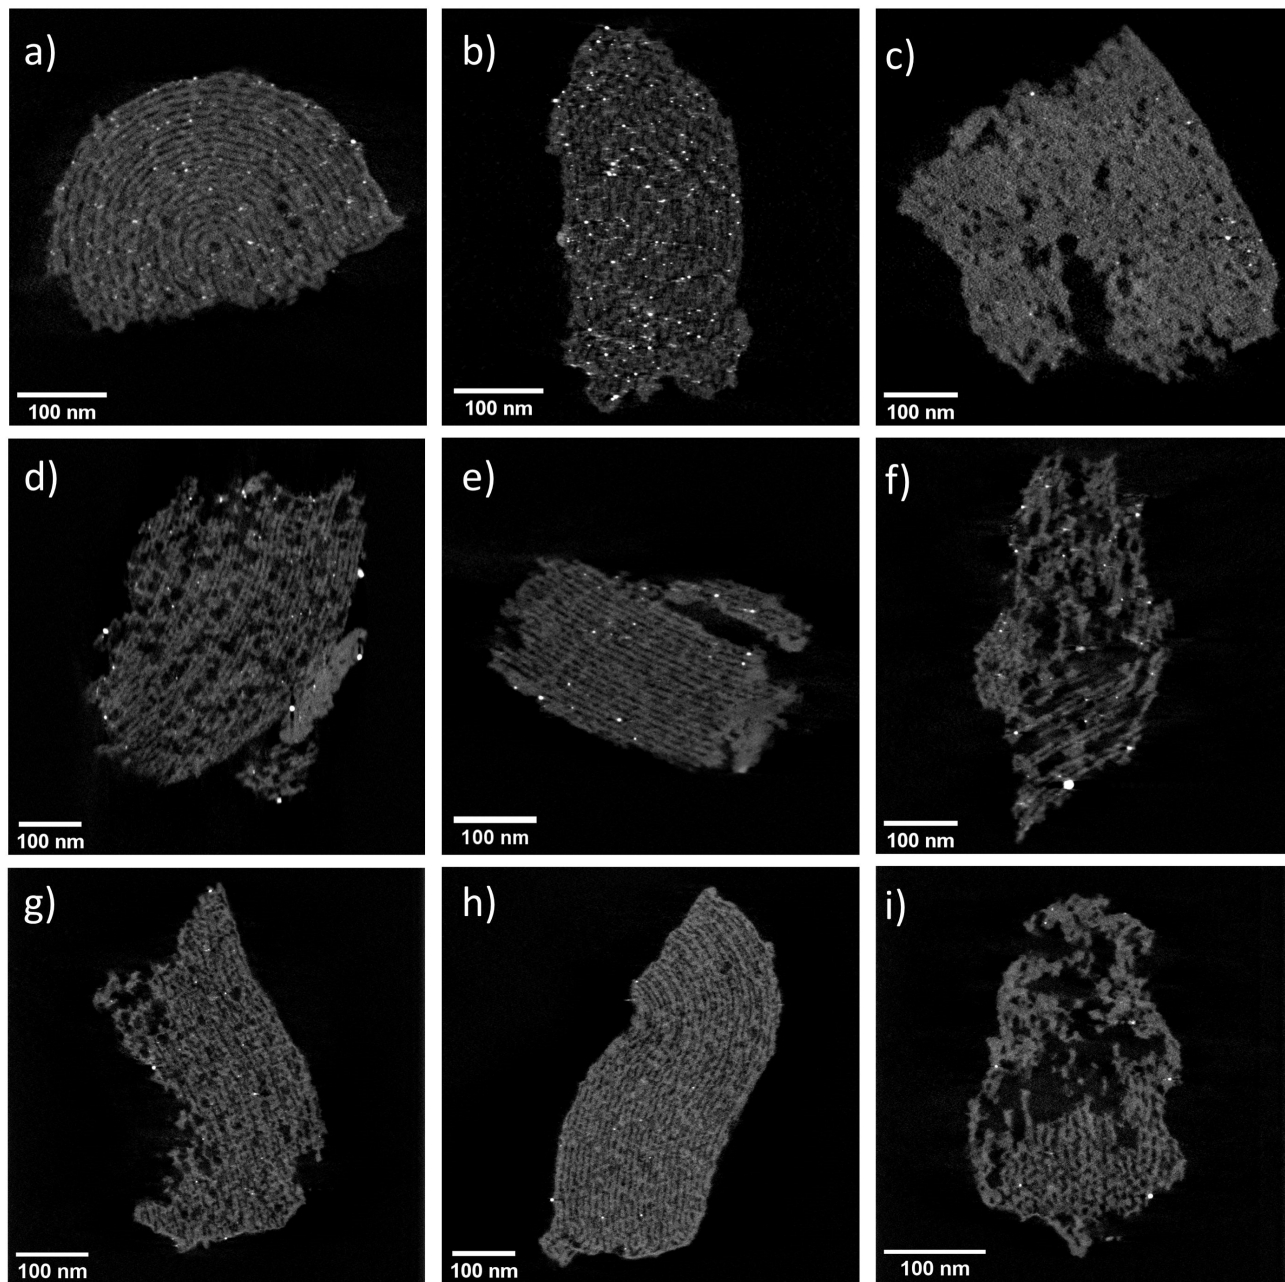

Supplement: d2na00664b3.pdf [file d2na00664b3.pdf]

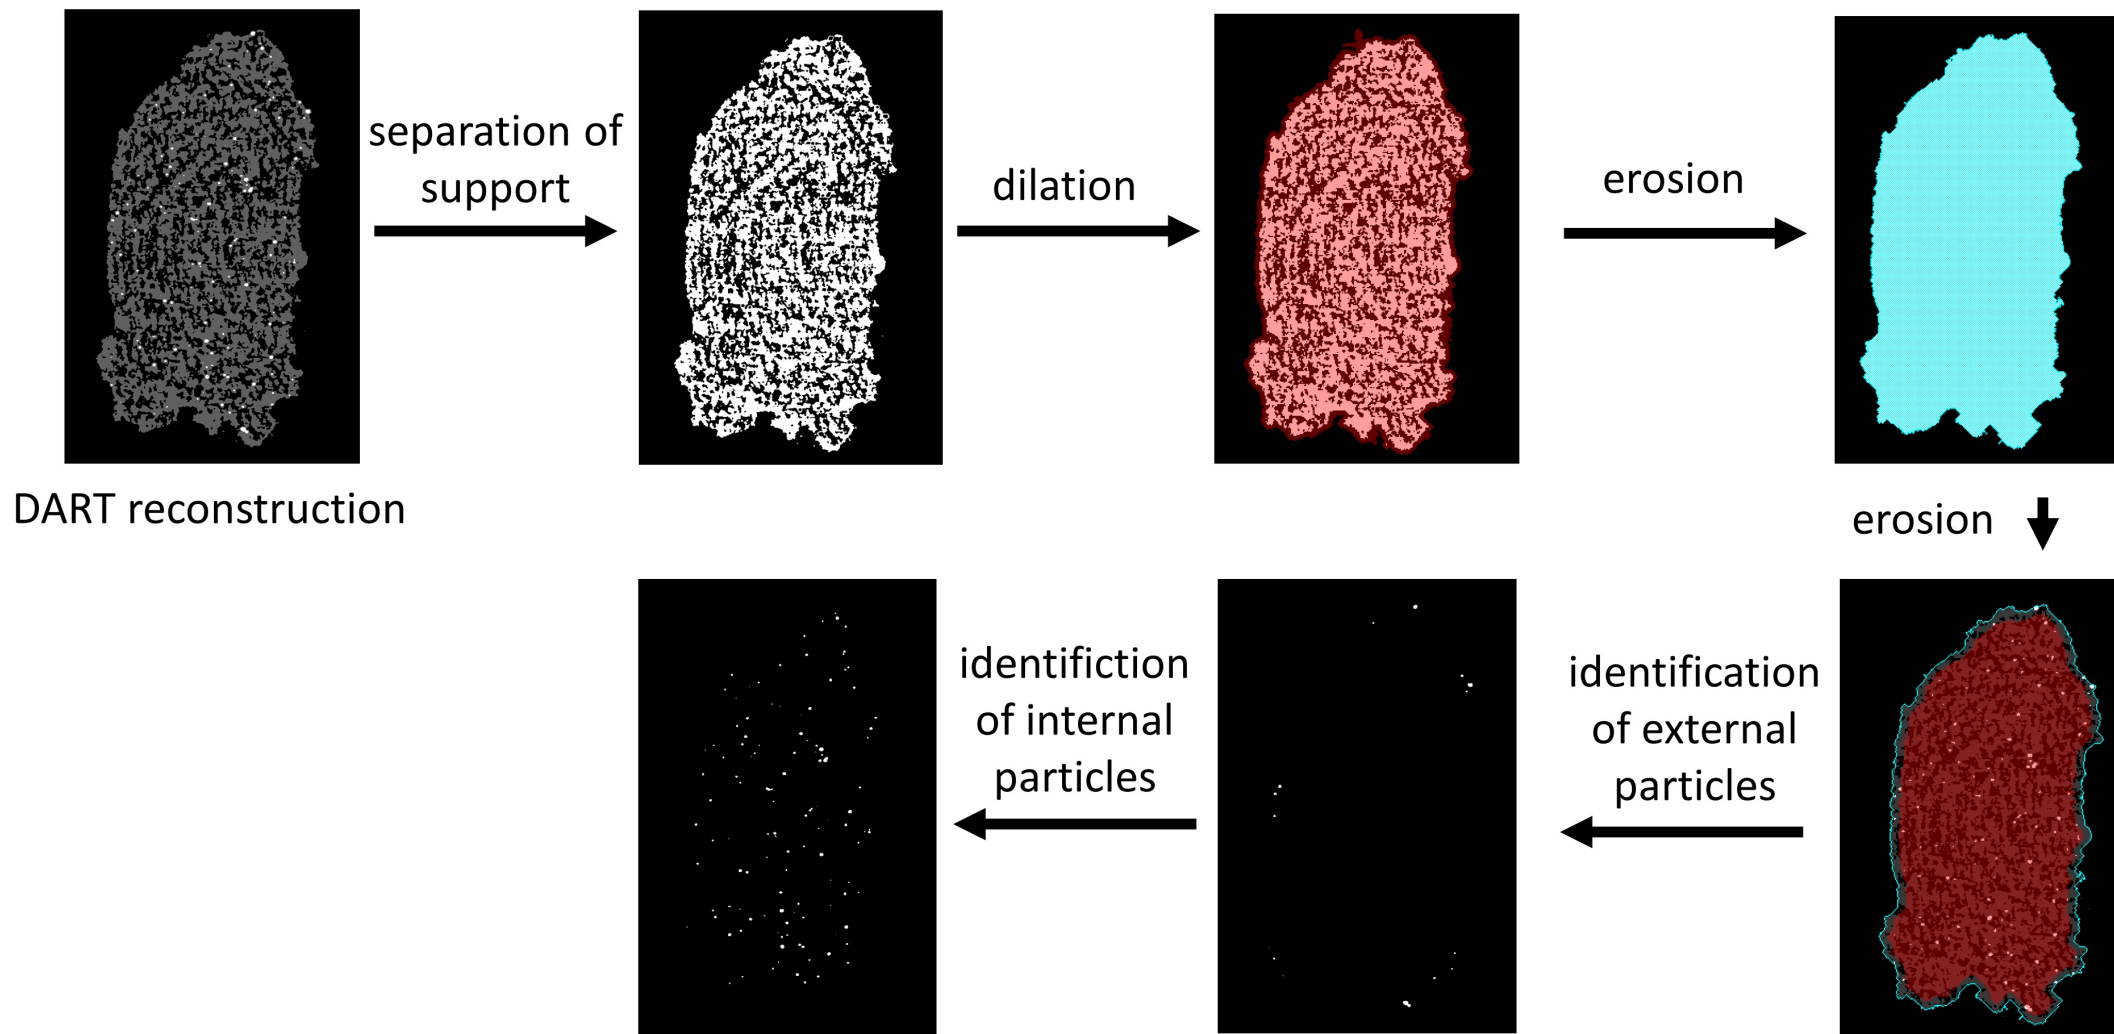

Supplement: d2na00664b4.pdf [file d2na00664b4.pdf]

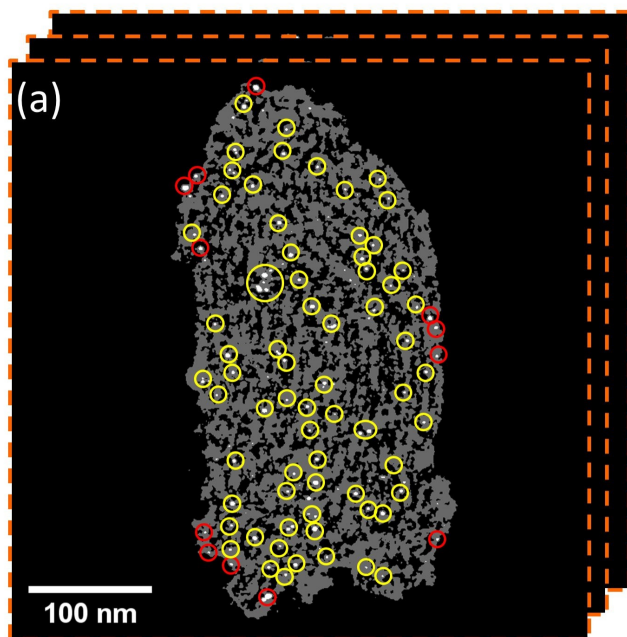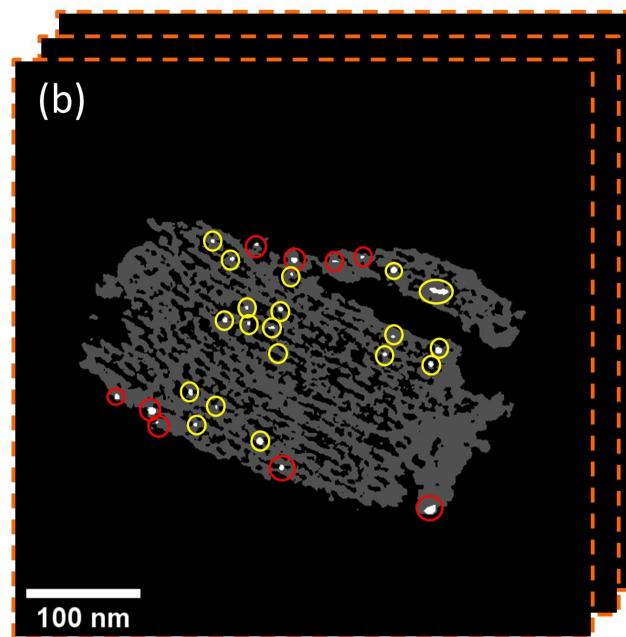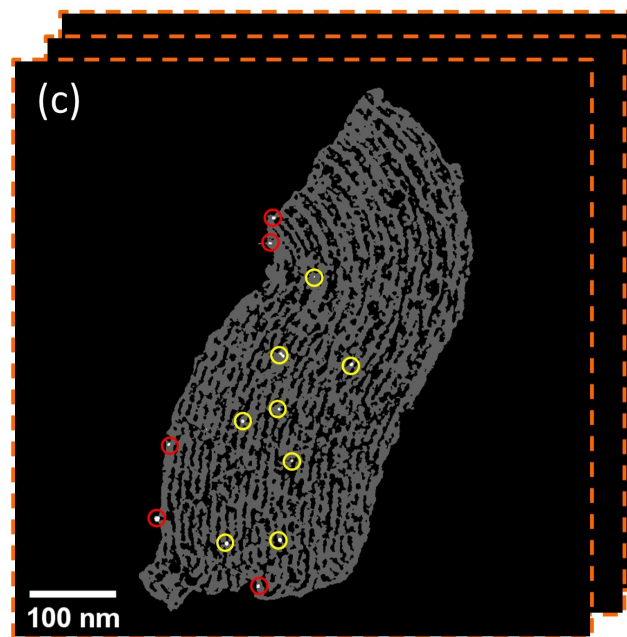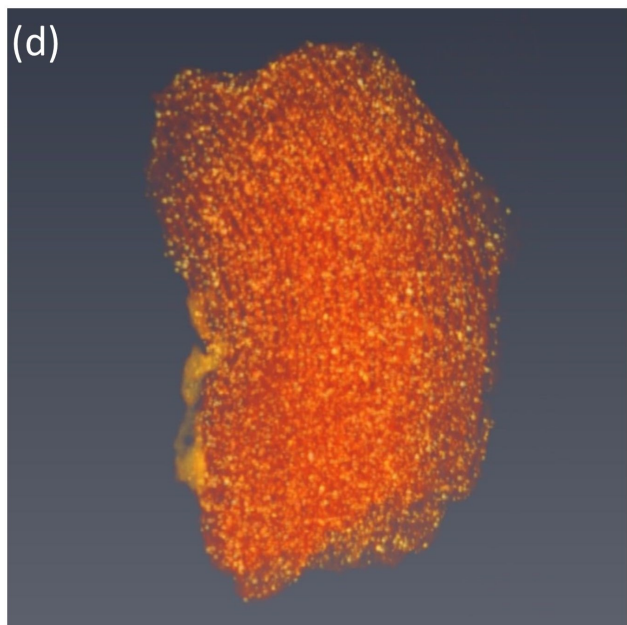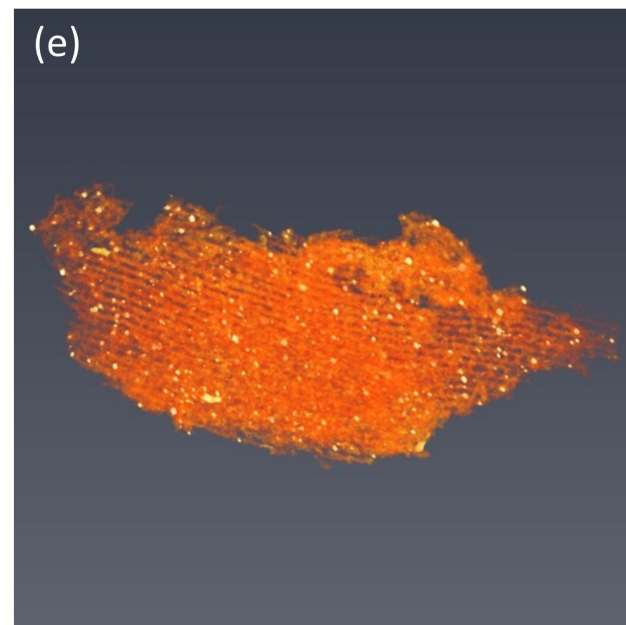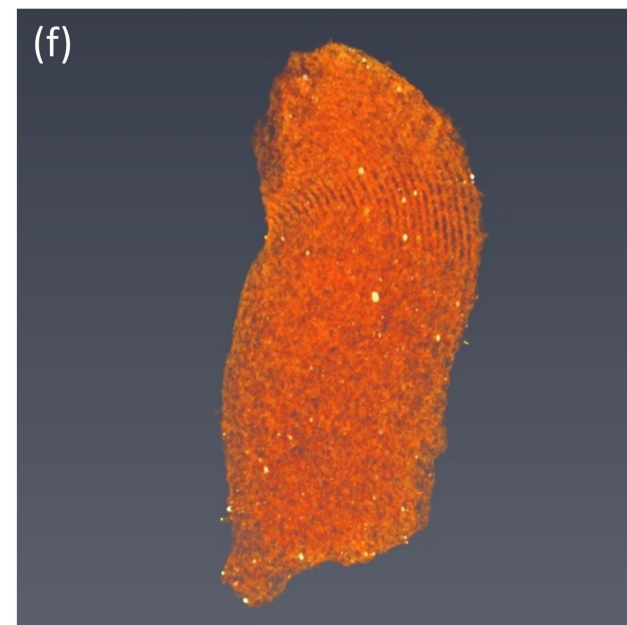

Supplement: d2na00664b5.pdf [file d2na00664b5.pdf]

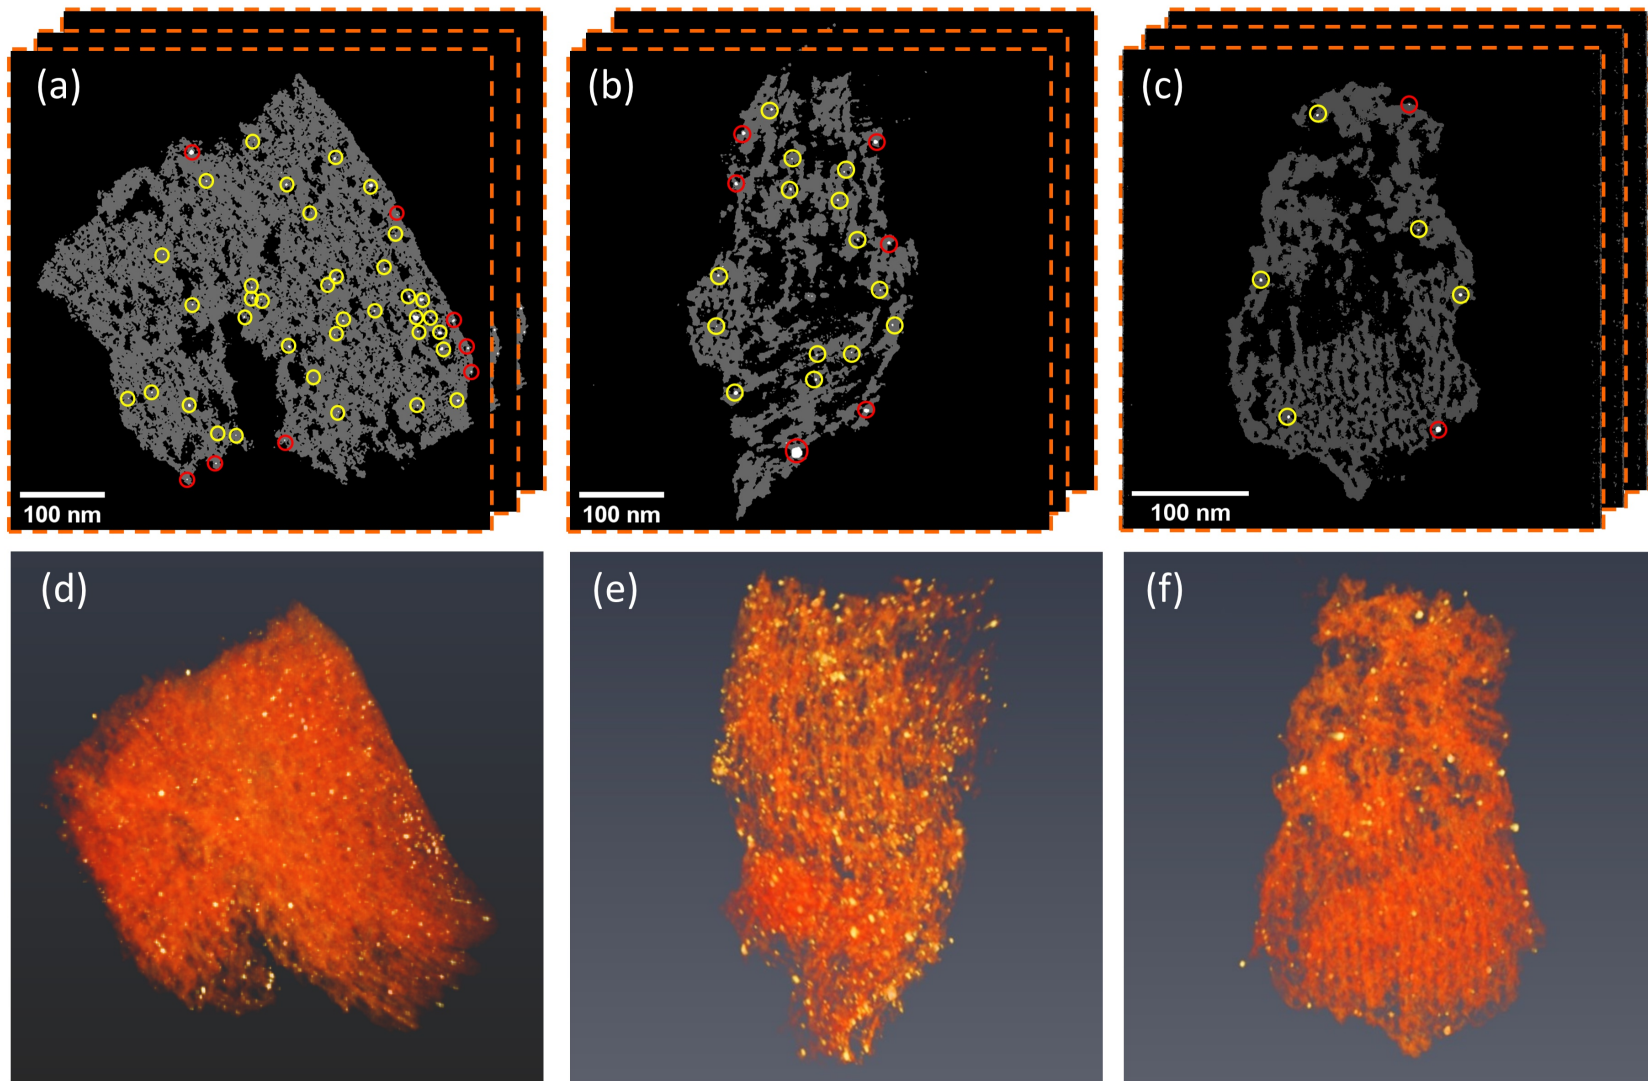

Supplement: d2na00664b6.pdf [file d2na00664b6.pdf]

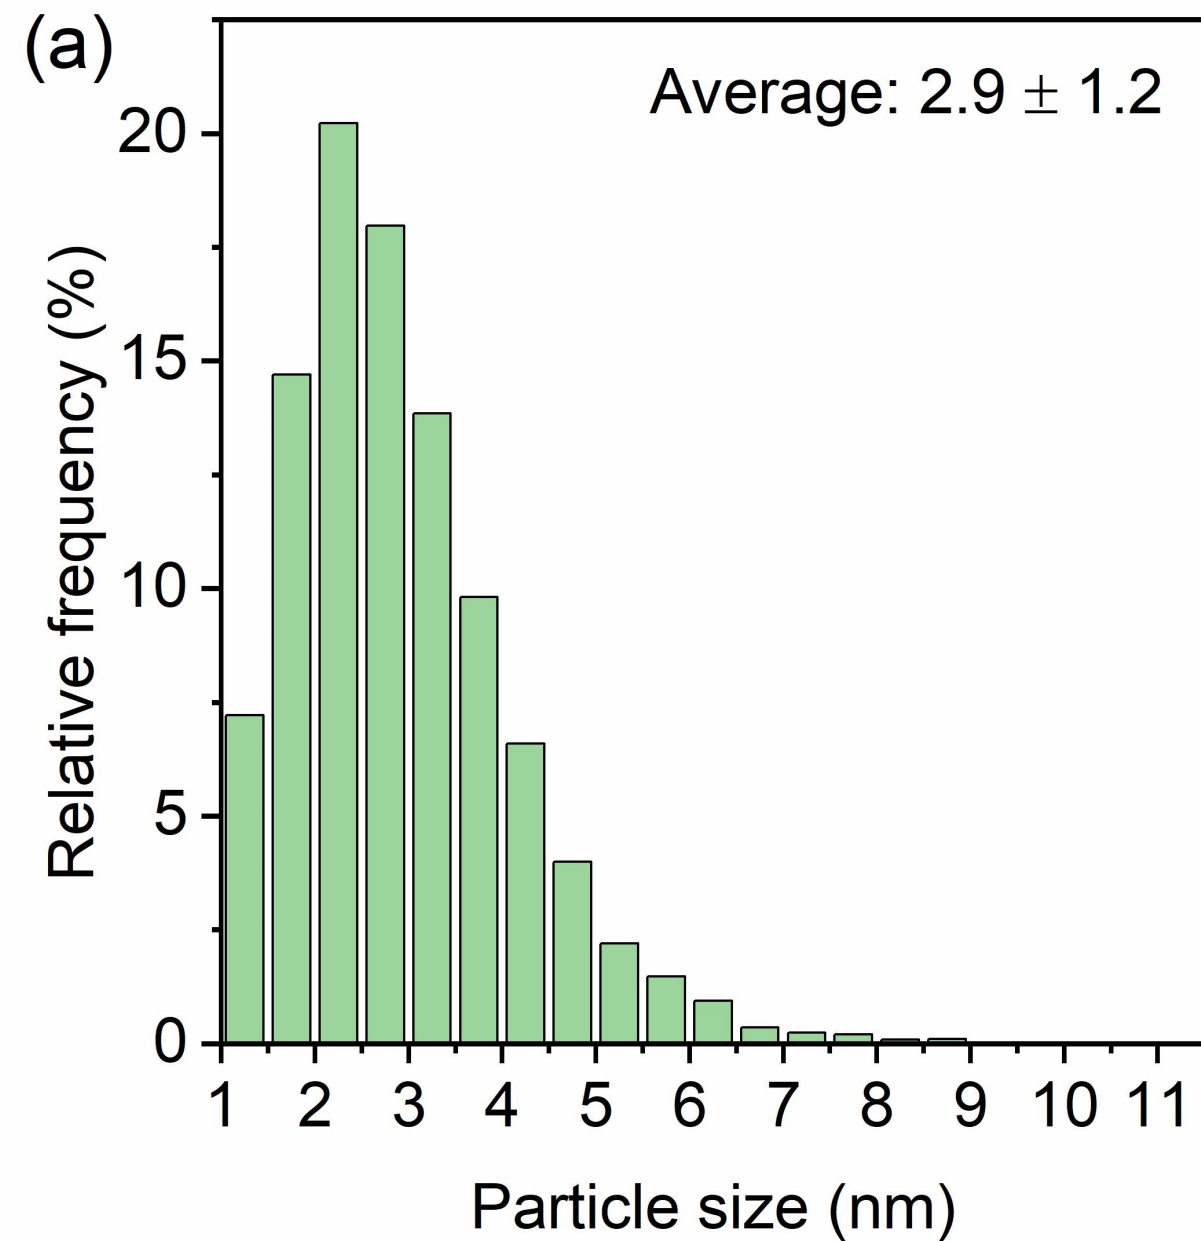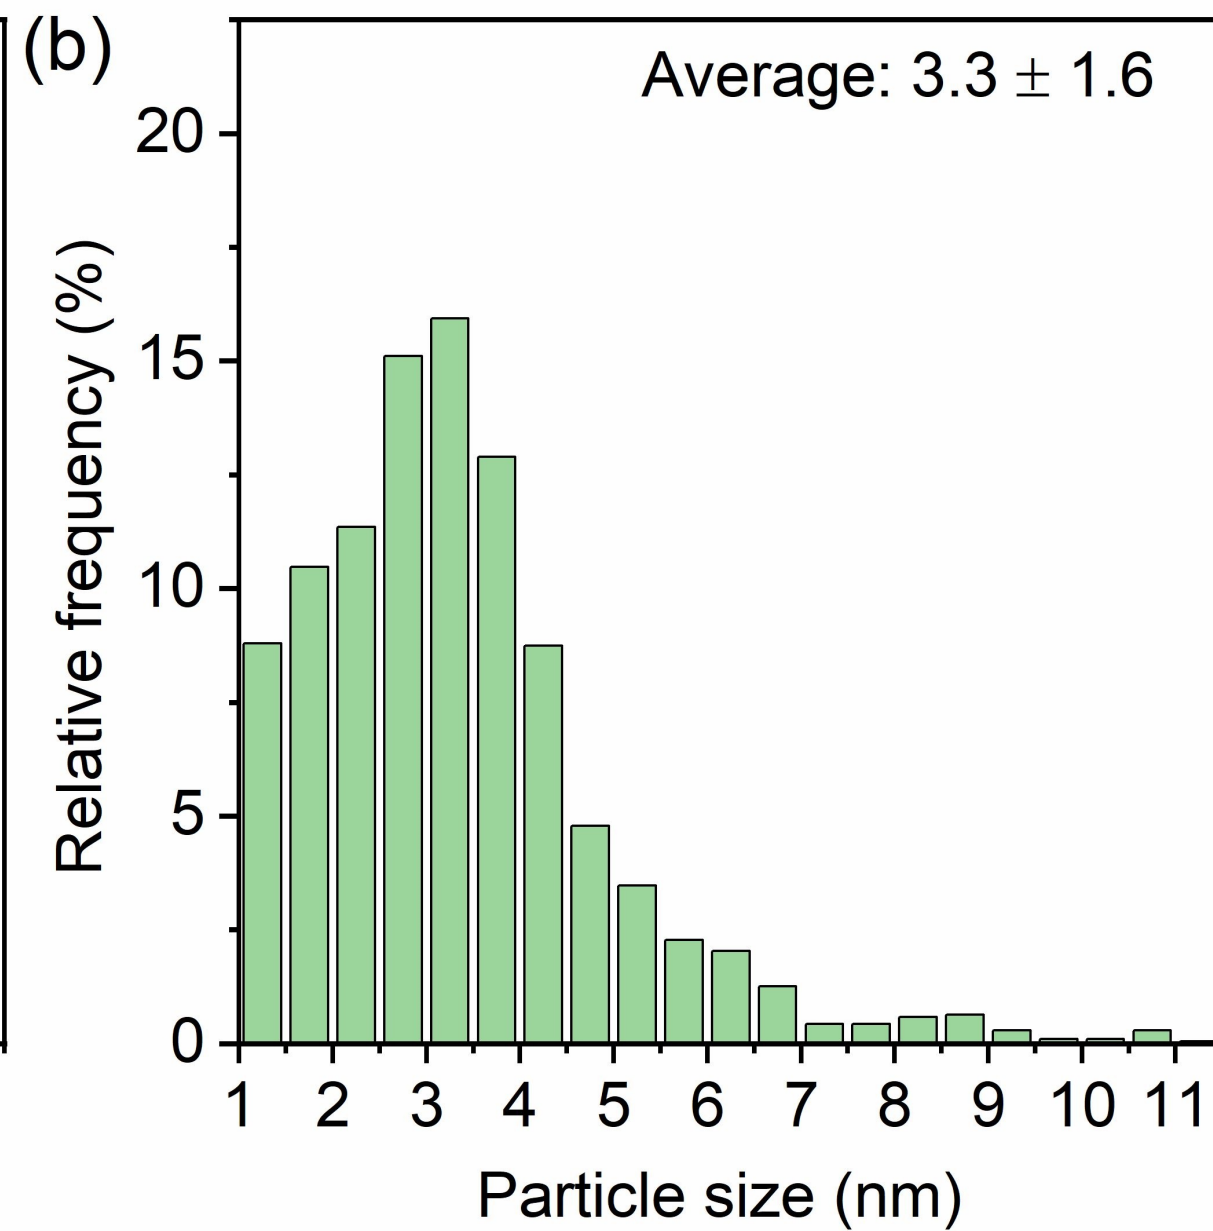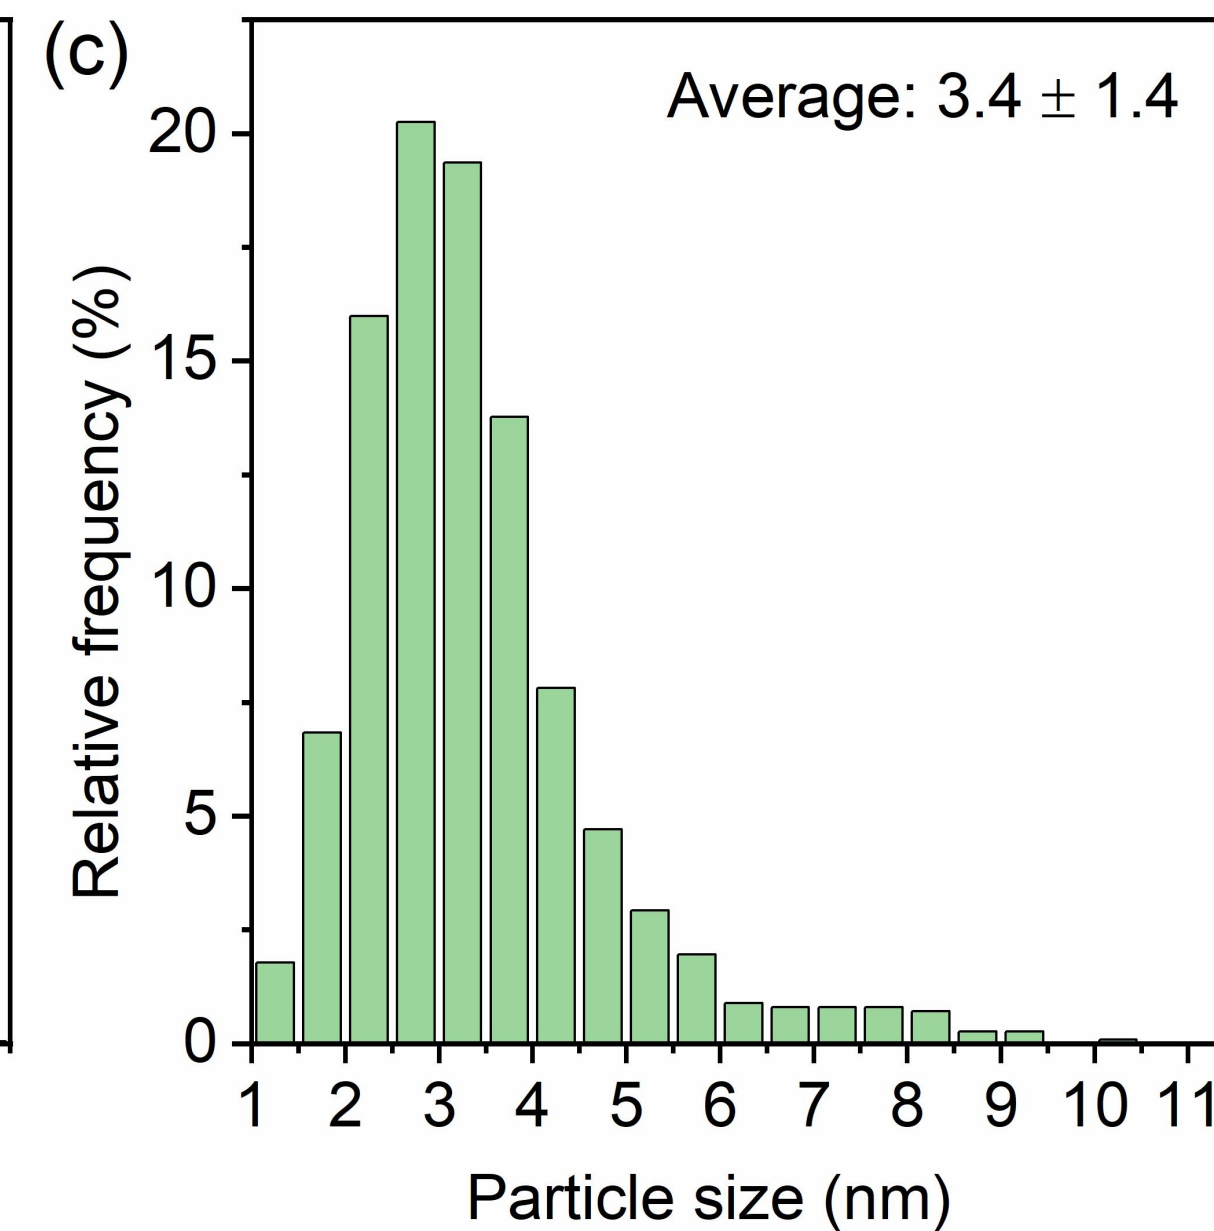

Supplement: d2na00664b8.pdf [file d2na00664b8.pdf]
