# Supplementary figures and images for: Disclosing the leaching behaviour of Pd@CMK3 catalysts in formic acid decomposition by electron tomography
Source: PubMed Central journal article supplement — Nanoscale Adv. 2023 Jan 3;5(4):1141–51. doi: 10.1039/d2na00664b (PMC9926883; doi:10.1039/d2na00664b), 2023-01-03

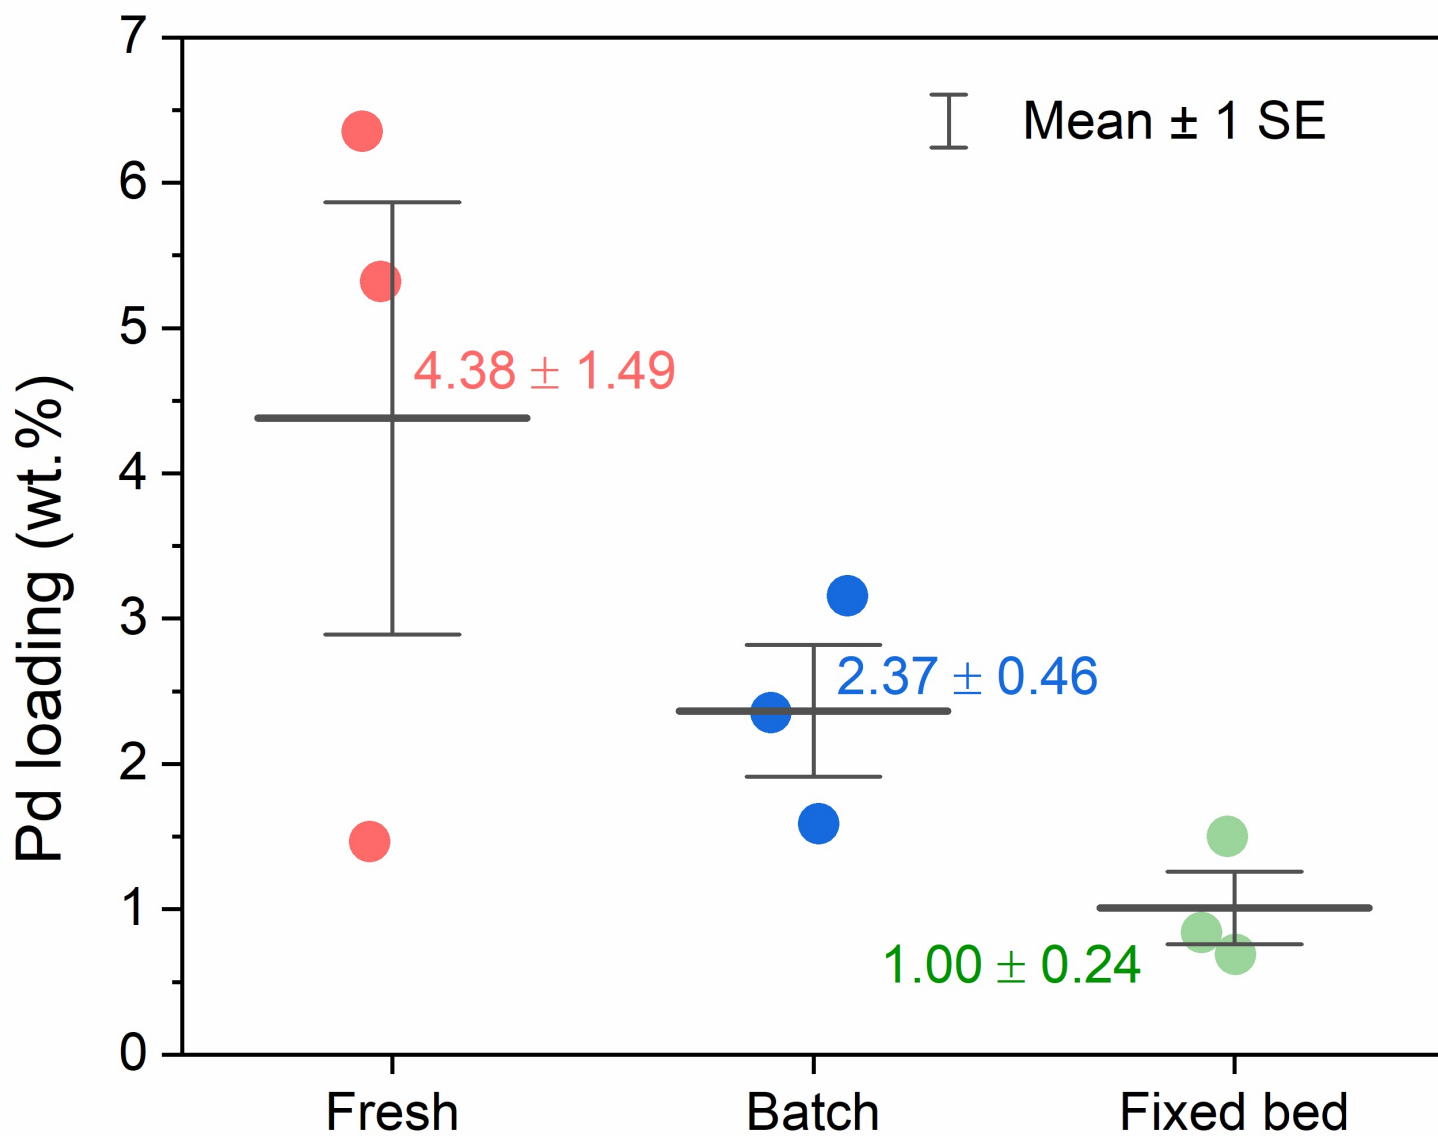

Supplement: NA-005-D2NA00664B-s007.pdf [file NA-005-D2NA00664B-s007.pdf]
